# Supplementary material
Source: publisher site journal article supplement (https://www.dovepress.com/article/217127)
Supplement: Supplementary file 1 [file get_supplementary_file.php]

Supplemental Table 1. Comparison of clinical characteristics between follow-up

group and non-follow-up group.）

|  | Follow up  (n=93) | Non-follow up  (n=838) | *P* |
| --- | --- | --- | --- |
| Age (year) | 14.01±0.143 | 13.71±0.051 | 0.063 |
| WC (cm) | 78.14±1.02 | 76.57±0.37 | 0.172 |
| WHR | 0.82±0.01 | 0.81±0.00 | 0.761 |
| BMI (kg/m2) | 22.10±0.40 | 21.52±0.15 | 0.202 |
| SBP (mmHg) | 119.73±1.26 | 117.36±0.49 | 0.119 |
| DBP (mmHg) | 72.62±1.11 | 73.16±0.38 | 0.653 |
| TG (mmol/l) | 0.94 (0.58, 1.25) | 0.94 (0.68, 1.31) | 0.115 |
| HDL-C (mmol/l) | 1.04 (0.90, 1.26) | 1.07 (0.87, 1.27) | 0.835 |
| LDL-C (mmol/l) | 3.36 (3.27, 3.51) | 3.30 (3.25, 3.48) | 0.113 |
| FPG (mmol/l) | 4.79±0.06 | 4.771±0.02 | 0.836 |
| Uric acid (mmol/l) | 328.02±27.93 | 309.71±3.10 | 0.064 |
| FINS (uIU/mL) | 18.00 (13.50, 23.25) | 18.00 (13.00, 24.00) | 0.804 |

Follow up: enrolled in the original investigation and participated in the follow-up evaluation; Non-follow up: enrolled in the original investigation but not participated in the follow-up evaluation. WC, waist circumference; WHR, waist-to-hip ratio; BMI, body mass index; SBP, systolic blood pressure; DBP, diastolic blood pressure; TG, triglycerides; HDL-C, high-density lipoprotein cholesterol; LDL-C, low-density lipoprotein cholesterol; FPG, fasting plasma glucose; FINS, fasting plasma insulin.
